# Supplementary material for: Microglial inclusions and neurofilament light chain release follow neuronal α-synuclein lesions in long-term brain slice cultures
Source: PubMed Central journal article supplement (PMC8356412; doi:10.1186/s13024-021-00471-2), 2021-08-11

Tg host

Ko host

5 weeks

+ tg brain extract

pS129

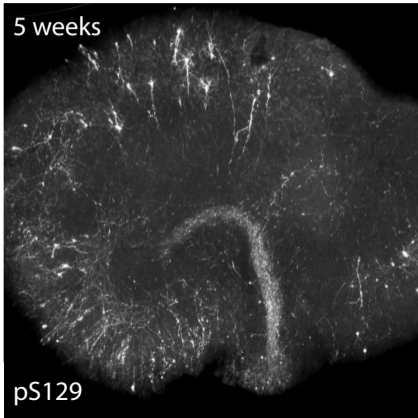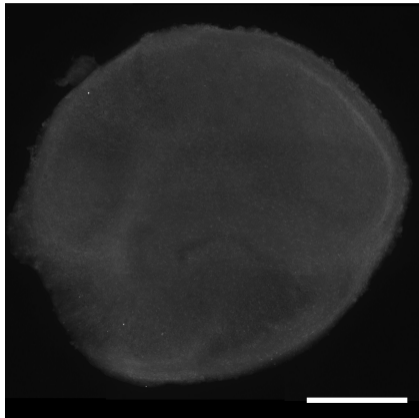

Supplement: 13024_2021_471_MOESM2_ESM.pdf [file 13024_2021_471_MOESM2_ESM.pdf]
