# Supplementary material for: Microglial inclusions and neurofilament light chain release follow neuronal α-synuclein lesions in long-term brain slice cultures
Source: Springer Nature journal article supplement (doi:10.1186/s13024-021-00471-2), 2021-08-11

**A** hippocampal injection of tg brain extract

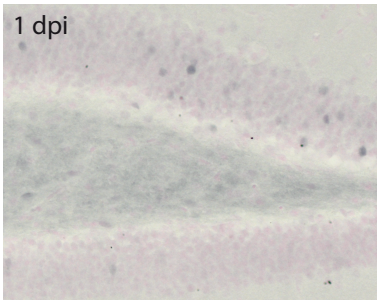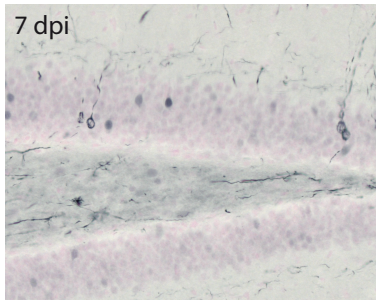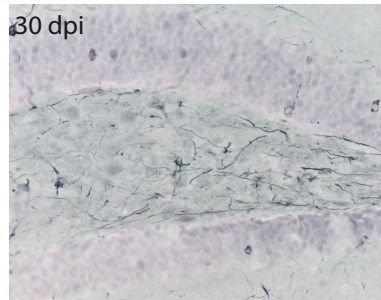

**B** hippocampal injection of wt brain extract

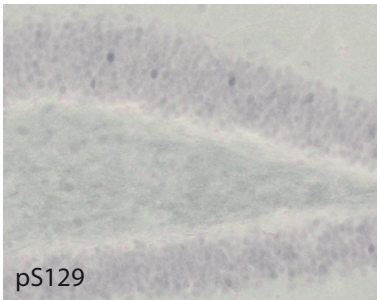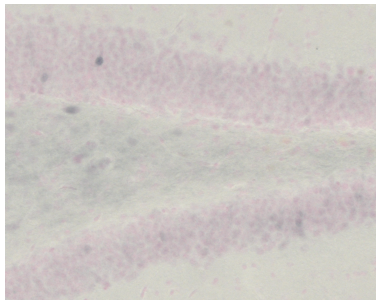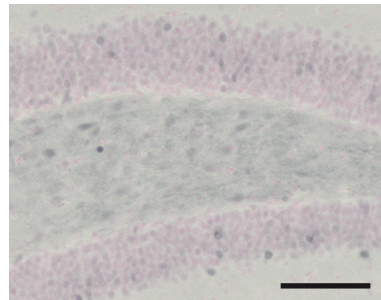

Supplement: MOESM4 [file 19562724]
