# Supplementary material for: Microglial inclusions and neurofilament light chain release follow neuronal α-synuclein lesions in long-term brain slice cultures
Source: Springer Nature journal article supplement (doi:10.1186/s13024-021-00471-2), 2021-08-11

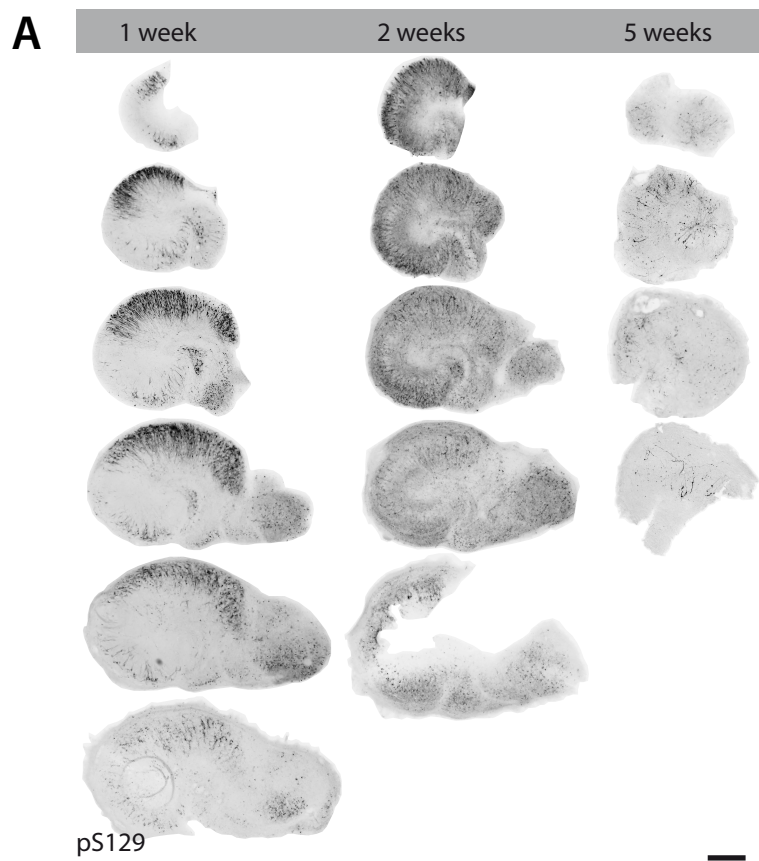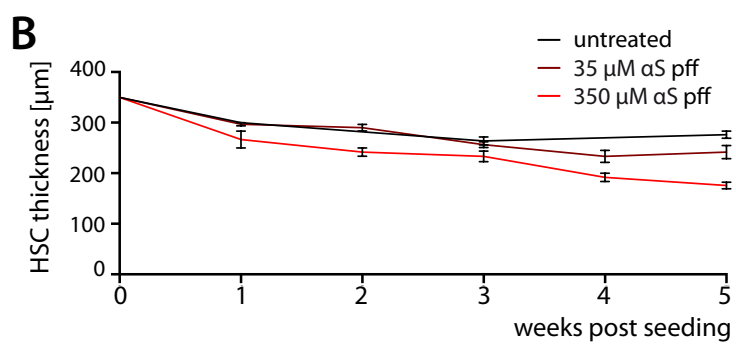

**C**      tg HSC, 5 weeks

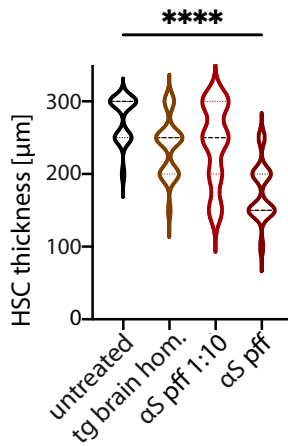

**D**      wt HSC, 5 weeks

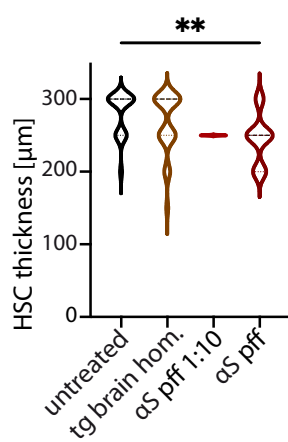

Supplement: MOESM5 [file 19562724]
